# Supplementary material
Source: HighWire-hosted journal article supplement (https://thorax.bmj.com/content/74/5/439)
Supplement: inline-supplementary-material-1 [file inline-supplementary-material-1.pdf]

**TITLE:**

**STUDY ID:**

## META-ANALYSIS / META-REGRESSION

### DATA COMPLETION FORM

#### GUIDANCE

- This questionnaire is designed to collect data on selected cardiovascular and musculoskeletal markers in clinically stable patients diagnosed with COPD measured at baseline for the outcome measures mortality, exacerbation and hospitalisation.
- For each outcome measure we are collecting the sample size, mean and standard deviation (SD), by those with and those without the event, for the variables 6MWD (six-minute walk distance), WBC (white blood cell count), log-CRP (C-reactive protein), IL-6 (interleukin-6), IL-8 (interleukin-8), fibrinogen, TNF-alpha, leukocytes, resting heart rate, QMVC (quadriceps maximal voluntary contraction) and SNIP (sniff nasal inspiratory pressure).
- Those with the event are defined as those with any number of exacerbations or hospitalisation. Those without the event are defined as those with no exacerbation or hospitalisation during the study period.
- In addition, for mortality we are collecting the unadjusted and adjusted (i.e. age, sex, BMI and smoking status) hazard ratio with 95% confidence interval (95% CI) for each variable. We will ask for which confounders you have been able to adjust for.
- If data were obtained from your publication it will already be completed but please check the values and correct if necessary. If you have not collected a particular outcome or variable please leave it blank.
- Please provide estimates in the indicated units. Also, note the preferred magnitude of effect.
- After completing please return to: [jmf88@medschl.cam.ac.uk](mailto:jmf88@medschl.cam.ac.uk)

## STUDY DETAILS

### DESIGN

*Indicate the study type*

- Cohort
- Case-control
- Other, (e.g. nested case-control or RCT): *please describe study design*

### LENGTH OF FOLLOW-UP

*Indicate the minimum length of follow-up in months*

Minimum: *months*

| OUTCOME: MORTALITY |                   |             |      |    |               |      |    |                               |                         |               |                       |               |
|--------------------|-------------------|-------------|------|----|---------------|------|----|-------------------------------|-------------------------|---------------|-----------------------|---------------|
| Marker             |                   | Survivors   |      |    | Non-survivors |      |    | Units used for effect measure | Unadjusted Hazard Ratio |               | Adjusted Hazard Ratio |               |
|                    | Units             | Sample size | Mean | SD | Sample size   | Mean | SD |                               | Estimate                | 95% CI        | Estimate              | 95% CI        |
| 6MWD               | meter             | n           | mean | SD | n             | mean | SD | per 50 meter                  | Unadjusted HR           | Lower – upper | Adjusted HR           | Lower – upper |
| WBC                | mc/L              | n           | mean | SD | n             | mean | SD | mc/L                          | Unadjusted HR           | Lower – upper | Adjusted HR           | Lower – upper |
| log-CRP            | mg/L              | n           | mean | SD | n             | mean | SD | mg/L                          | Unadjusted HR           | Lower – upper | Adjusted HR           | Lower – upper |
| IL-6               | pg/ml             | n           | mean | SD | n             | mean | SD | pg/ml                         | Unadjusted HR           | Lower – upper | Adjusted HR           | Lower – upper |
| IL-8               | pg/ml             | n           | mean | SD | n             | mean | SD | pg/ml                         | Unadjusted HR           | Lower – upper | Adjusted HR           | Lower – upper |
| Fibrinogen         | g/dL              | n           | mean | SD | n             | mean | SD | g/dL                          | Unadjusted HR           | Lower – upper | Adjusted HR           | Lower – upper |
| TNF-alpha          | pg/ml             | n           | mean | SD | n             | mean | SD | pg/ml                         | Unadjusted HR           | Lower – upper | Adjusted HR           | Lower – upper |
| Leukocytes         | x 10 <sup>9</sup> | n           | mean | SD | n             | mean | SD | x 10 <sup>9</sup>             | Unadjusted              | Lower –       | Adjusted              | Lower –       |

|                    |                    |   |      |    |   |      |    |                           |               |               |             |               |
|--------------------|--------------------|---|------|----|---|------|----|---------------------------|---------------|---------------|-------------|---------------|
|                    | cells/L            |   |      |    |   |      |    | cells/L                   | ed HR         | upper         | HR          | upper         |
| Resting heart rate | bpm                | n | mean | SD | n | mean | SD | per 10 bpm                | Unadjusted HR | Lower – upper | Adjusted HR | Lower – upper |
| QMVC               | kg                 | n | mean | SD | n | mean | SD | per 5 kg                  | Unadjusted HR | Lower – upper | Adjusted HR | Lower – upper |
| SNIP               | cmH <sub>2</sub> O | n | mean | SD | n | mean | SD | per 10 cmH <sub>2</sub> O | Unadjusted HR | Lower – upper | Adjusted HR | Lower – upper |

### ADJUSTMENT VARIABLES

Select the variables you have adjusted for in the estimation of adjusted hazard ratios

- Age
- Sex
- BMI
- Smoking status

## OUTCOME: EXACERBATION

| Marker             |                           | Exacerbators |      |    | Non-exacerbators |      |    |
|--------------------|---------------------------|--------------|------|----|------------------|------|----|
|                    | Units                     | Sample size  | Mean | SD | Sample size      | Mean | SD |
| 6MWD               | meter                     | n            | mean | SD | n                | mean | SD |
| WBC                | mc/L                      | n            | mean | SD | n                | mean | SD |
| log-CRP            | mg/L                      | n            | mean | SD | n                | mean | SD |
| IL-6               | pg/ml                     | n            | mean | SD | n                | mean | SD |
| IL-8               | pg/ml                     | n            | mean | SD | n                | mean | SD |
| Fibrinogen         | g/dL                      | n            | mean | SD | n                | mean | SD |
| TNF-alpha          | pg/ml                     | n            | mean | SD | n                | mean | SD |
| Leukocytes         | x 10 <sup>9</sup> cells/L | n            | mean | SD | n                | mean | SD |
| Resting heart rate | bpm                       | n            | mean | SD | n                | mean | SD |
| QMVC               | kg                        | n            | mean | SD | n                | mean | SD |
| SNIP               | cmH <sub>2</sub> O        | n            | mean | SD | n                | mean | SD |

## OUTCOME: HOSPITALISATION

| Marker             |                       | Hospitalisation |      |    | Non-hospitalisation |      |    |
|--------------------|-----------------------|-----------------|------|----|---------------------|------|----|
|                    | Units                 | Sample size     | Mean | SD | Sample size         | Mean | SD |
| 6MWD               | meter                 | n               | mean | SD | n                   | mean | SD |
| WBC                | mc/L                  | n               | mean | SD | n                   | mean | SD |
| log-CRP            | mg/L                  | n               | mean | SD | n                   | mean | SD |
| IL-6               | pg/ml                 | n               | mean | SD | n                   | mean | SD |
| IL-8               | pg/ml                 | n               | mean | SD | n                   | mean | SD |
| Fibrinogen         | g/dL                  | n               | mean | SD | n                   | mean | SD |
| TNF-alpha          | pg/ml                 | n               | mean | SD | n                   | mean | SD |
| Leukocytes         | $\times 10^9$ cells/L | n               | mean | SD | n                   | mean | SD |
| Resting heart rate | bpm                   | n               | mean | SD | n                   | mean | SD |
| QMVC               | kg                    | n               | mean | SD | n                   | mean | SD |
| SNIP               | cmH <sub>2</sub> O    | n               | mean | SD | n                   | mean | SD |

This is the end of the data completion form. Thank you for your input! Please return the form to: [jmf88@medschl.cam.ac.uk](mailto:jmf88@medschl.cam.ac.uk)
