# Supplementary material
Source: HighWire-hosted journal article supplement (https://thorax.bmj.com/content/74/5/439)
Supplement: inline-supplementary-material-2 [file inline-supplementary-material-2.docx]

**Supplementary material**

**Table S1** Search strategies

| Terms related to pulmonary disease | Terms related to selected CV and musculoskeletal biomarkers | Terms related to clinical adverse outcomes | Terms related to study designs |
| --- | --- | --- | --- |
| 1. exp Pulmonary Disease, Chronic Obstructive/ | 9. biological marker.tw. | 36. exp Cardiovascular Diseases/ | 52. exp Cohort Studies/ |
| 2. chronic obstructive pulmonary disease.tw. | 10. systemic inflammation.tw. | 37. cardiovascular disease.tw. | 53. cohort stud$.tw. |
| 3. COPD.tw. | 11. exp Leukocytes/ | 38. exp Hospitalization/ | 54. exp Prospective Studies/ |
| 4. pulmonary emphysema.tw. | 12. exp Interleukin-6/ | 39. hospitali$.tw. | 55. prospective.tw. |
| 5. chronic bronchitis.tw. | 13. exp Interleukin-8/ | 40. patient admission.tw. | 56. longitudinal stud$.tw. |
| 6. exp Forced Expiratory Volume/ | 14. exp Fibrinogen/ | 41. exp Death/ | 57. exp Case-Control Studies/ |
| 7. exp Vital Capacity/ | 15. exp Tumor Necrosis Factor-alpha/ | 42. death.tw. | 58. case-control stud$.tw. |
| 8. or/1-7 | 16. exp C-Reactive Pro- tein/ | 43. exp Mortality/ | 59. exp Randomized Controlled Trials as Topic/ |
|  | 17. exp Carotid Intima- Media Thickness/ | 44. mortality.tw. | 60. rct.tw. |
|  | 18. CIMT.tw. | 45. outcome.tw. | 61. or/52-60 |
|  | 19. exp Pulse Wave Analysis/ | 46. exp Prognosis/ | 62. 8 and 35 and 51 and 61 |
|  | 20. pulse wave velocity.tw. | 47. prognos$.tw. |  |
|  | 21. PWV.tw. | 48. exp Survival Analysis/ |  |
|  | 22. augmentation in- dex.tw. | 49. survival.tw. |  |
|  | 23. AIx.tw. | 50. exacerbation.tw. |  |
|  | 24. exp Heart Rate/ | 51. or/36-50 |  |
|  | 25. 6 minute walk$.tw. |  |  |
|  | 26. 6mwt.tw. |  |  |
|  | 27. 6mwd.tw. |  |  |
|  | 28. exp Quadriceps Muscle/ |  |  |
|  | 29. quadriceps max$ voluntary contraction.tw. |  |  |
|  | 30. qmvc.tw. |  |  |
|  | 31. sniff nasal inspiratory pressure.tw. |  |  |
|  | 32. snip.tw. |  |  |
|  | 33. short physical performance battery.tw. |  |  |
|  | 34. sppb.tw. |  |  |
|  | 35. or/9-34 |  |  |

*Terms related to ’pulmonary disease’ were combined with terms related to ’cardiovascular and musculoskeletal biomarker, ’clinical outcome’ and ‘study design’. Search strategy was used with Medline (Ovid) and modified as necessary for use with the other databases. For MeSH terms, all subheadings selected. exp, exploded MeSH term; tw, text word.

**Table S2** QUADAS-2 scoring

| Study ID | Follow-up period | Sample size | Reporting of sample characteristics | Method of defining COPD | Age study participants | Study type | Quality score | Tertile |
| --- | --- | --- | --- | --- | --- | --- | --- | --- |
| Agu002 | [4] >36 months | [4] >500 | [2] All four | [2] Spirometry | [2] <65 | [1] Cohort or case-control | 15 | 3/3 |
| Agu003 | [4] >36 months | [4] >500 | [2] All four | [2] Spirometry | [2] <65 | [1] Cohort or case-control | 15 | 3/3 |
| Dah059 | [4] >36 months | [4] >500 | [2] All four | [2] Spirometry | [2] <65 | [1] Cohort or case-control | 15 | 3/3 |
| Dah061 | [4] >36 months | [4] >500 | [2] All four | [2] Spirometry | [2] <65 | [1] Cohort or case-control | 15 | 3/3 |
| Jen108 | [4] >36 months | [4] >500 | [2] All four | [2] Spirometry | [2] <65 | [1] Cohort or case-control | 15 | 3/3 |
| Man128 | [4] >36 months | [4] >500 | [2] All four | [2] Spirometry | [2] <65 | [1] Cohort or case-control | 15 | 3/3 |
| Man129 | [4] >36 months | [4] >500 | [2] All four | [2] Spirometry | [2] <65 | [1] Cohort or case-control | 15 | 3/3 |
| Par148 | [4] >36 months | [4] >500 | [2] All four | [2] Spirometry | [2] <65 | [1] Cohort or case-control | 15 | 3/3 |
| Val187 | [4] >36 months | [4] >500 | [2] All four | [2] Spirometry | [2] <65 | [1] Cohort or case-control | 15 | 3/3 |
| Hur203 | 4] >36 months | [4] >500 | [2] All four | [2] Spirometry | [2] <65 | [1] Cohort or case-control | 15 | 3/3 |
| Cas038 | [4] >36 months | [4] >500 | [2] All four | [2] Spirometry | [1] 65-70 | [1] Cohort or case-control | 14 | 3/3 |
| Cot051 | [4] >36 months | [4] >500 | [2] All four | [2] Spirometry | [1] 65-70 | [1] Cohort or case-control | 14 | 3/3 |
| Tho180 | [4] >36 months | [4] >500 | [2] All four | [2] Spirometry | [1] 65-70 | [1] Cohort or case-control | 14 | 3/3 |
| Cel039 | [2] 12-36 months | [4] >500 | [2] All four | [2] Spirometry | [2] <65 | [1] Cohort or case-control | 13 | 3/3 |
| Mil135 | [2] 12-36 months | [4] >500 | [2] All four | [2] Spirometry | [2] <65 | [1] Cohort or case-control | 13 | 3/3 |
| Mul141 | [2] 12-36 months | [4] >500 | [2] All four | [2] Spirometry | [2] <65 | [1] Cohort or case-control | 13 | 3/3 |
| Spr174 | [2] 12-36 months | [4] >500 | [2] All four | [2] Spirometry | [2] <65 | [1] Cohort or case-control | 13 | 3/3 |
| Dah060 | [4] >36 months | [4] >500 | [0] Age + gender + BMI or smoking status | [2] Spirometry | [1] 65-70 | [1] Cohort or case-control | 12 | 3/3 |
| Blu029 | [4] >36 months | [2] 250-500 | [2] All four | [2] Spirometry | [1] 65-70 | [0] RCT | 11 | 2/3 |
| Hus104 | [2] 12-36 months | [2] 250-500 | [2] All four | [2] Spirometry | [2] <65 | [1] Cohort or case-control | 11 | 2/3 |
| Sin172 | [2] 12-36 months | [2] 250-500 | [2] All four | [2] Spirometry | [2] <65 | [1] Cohort or case-control | 11 | 2/3 |
| Swa178 | [4] >36 months | [0] <250 | [2] All four | [2] Spirometry | [2] <65 | [1] Cohort or case-control | 11 | 2/3 |
| War193 | [4] >36 months | [2] 250-500 | [2] All four | [2] Spirometry | 0] >70 | [1] Cohort or case-control | 11 | 2/3 |
| Was195 | [4] >36 months | [0] <250 | [2] All four | [2] Spirometry | [2] <65 | [1] Cohort or case-control | 11 | 2/3 |
| Can037 | [2] 12-36 months | [2] 250-500 | [2] All four | [2] Spirometry | [1] 65-70 | [1] Cohort or case-control | 10 | 2/3 |
| Cot053 | [4] >36 months | [2] 250-500 | [0] Age + gender + BMI or smoking status | [2] Spirometry | [1] 65-70 | [1] Cohort or case-control | 10 | 2/3 |
| Cot054 | [4] >36 months | [2] 250-500 | [0] Age + gender + BMI or smoking status | [2] Spirometry | [1] 65-70 | [1] Cohort or case-control | 10 | 2/3 |
| Gro097 | [2] 12-36 months | [2] 250-500 | [2] All four | [2] Spirometry | [2] <65 | [0] RCT | 10 | 2/3 |
| Gro099 | [4] >36 months | [2] 250-500 | [2] All four | [2] Spirometry | 0] >70 | [0] RCT | 10 | 2/3 |
| Liu123 | [2] 12-36 months | [2] 250-500 | [2] All four | [2] Spirometry | [2] <65 | [0] RCT | 10 | 2/3 |
| Liu124 | [4] >36 months | [0] <250 | [2] All four | [2] Spirometry | [1] 65-70 | [1] Cohort or case-control | 10 | 2/3 |
| Pin155 | [2] 12-36 months | [2] 250-500 | [2] All four | [2] Spirometry | [1] 65-70 | [1] Cohort or case-control | 10 | 2/3 |
| Dur073 | [4] >36 months | [2] 250-500 | [0] Age + gender + BMI or smoking status | [2] Spirometry | [1] 65-70 | [0] RCT | 9 | 2/3 |
| Fag078 | [2] 12-36 months | [0] <250 | [2] All four | [2] Spirometry | [2] <65 | [1] Cohort or case-control | 9 | 2/3 |
| Hop103 | [2] 12-36 months | [0] <250 | [2] All four | [2] Spirometry | [2] <65 | [1] Cohort or case-control | 9 | 2/3 |
| Moo138 | 4] >36 months | [0] <250 | [0] Age + gender + BMI or smoking status | [2] Spirometry | [2] <65 | [1] Cohort or case-control | 9 | 2/3 |
| Ozg144 | 4] >36 months | [0] <250 | [0] Age + gender + BMI or smoking status | [2] Spirometry | [2] <65 | [1] Cohort or case-control | 9 | 2/3 |
| Cot052 | [2] 12-36 months | [0] <250 | [2] All four | [2] Spirometry | [1] 65-70 | [1] Cohort or case-control | 8 | 1/3 |
| de 065 | [2] 12-36 months | [0] <250 | [2] All four | [2] Spirometry | [1] 65-70 | [1] Cohort or case-control | 8 | 1/3 |
| Don069 | [2] 12-36 months | [0] <250 | [2] All four | [2] Spirometry | [1] 65-70 | [1] Cohort or case-control | 8 | 1/3 |
| Dre070 | [2] 12-36 months | [0] <250 | [2] All four | [2] Spirometry | [1] 65-70 | [1] Cohort or case-control | 8 | 1/3 |
| Gak090 | [2] 12-36 months | [0] <250 | [2] All four | [2] Spirometry | [1] 65-70 | [1] Cohort or case-control | 8 | 1/3 |
| Jen107 | [2] 12-36 months | [0] <250 | [2] All four | [2] Spirometry | [1] 65-70 | [1] Cohort or case-control | 8 | 1/3 |
| Lac119 | 4] >36 months | [0] <250 | [0] Age + gender + BMI or smoking status | [2] Spirometry | [1] 65-70 | [1] Cohort or case-control | 8 | 1/3 |
| Wed196 | [2] 12-36 months | [0] <250 | [2] All four | [2] Spirometry | [1] 65-70 | [1] Cohort or case-control | 8 | 1/3 |
| Bu,032 | [2] 12-36 months | [0] <250 | [2] All four | [2] Spirometry | 0] >70 | [1] Cohort or case-control | 7 | 1/3 |
| Bud033 | [2] 12-36 months | [0] <250 | [0] Age + gender + BMI or smoking status | [2] Spirometry | [2] <65 | [1] Cohort or case-control | 7 | 1/3 |
| Den066 | [2] 12-36 months | [0] <250 | [2] All four | [2] Spirometry | 0] >70 | [1] Cohort or case-control | 7 | 1/3 |
| Fer083 | [2] 12-36 months | [0] <250 | [0] Age + gender + BMI or smoking status | [2] Spirometry | [2] <65 | [1] Cohort or case-control | 7 | 1/3 |
| Mon137 | [2] 12-36 months | [0] <250 | [2] All four | [2] Spirometry | [1] 65-70 | 0] RCT | 7 | 1/3 |
| Moy139 | [2] 12-36 months | [0] <250 | [2] All four | [2] Spirometry | 0] >70 | [1] Cohort or case-control | 7 | 1/3 |
| Moy140 | [2] 12-36 months | [0] <250 | [2] All four | [2] Spirometry | 0] >70 | [1] Cohort or case-control | 7 | 1/3 |
| Pow159 | [2] 12-36 months | [0] <250 | [2] All four | [2] Spirometry | [1] 65-70 | 0] RCT | 7 | 1/3 |
| Ant017 | [2] 12-36 months | [0] <250 | 0] Age + gender + BMI or smoking status | [2] Spirometry | [1] 65-70 | [1] Cohort or case-control | 6 | 1/3 |
| Baf020 | [2] 12-36 months | [0] <250 | [0] Age + gender + BMI or smoking status | [2] Spirometry | [1] 65-70 | [1] Cohort or case-control | 6 | 1/3 |
| Daj062 | [2] 12-36 months | [0] <250 | [0] Age + gender + BMI or smoking status | [2] Spirometry | [1] 65-70 | [1] Cohort or case-control | 6 | 1/3 |
| Fer084 | [2] 12-36 months | [0] <250 | [0] Age + gender + BMI or smoking status | [2] Spirometry | [1] 65-70 | [1] Cohort or case-control | 6 | 1/3 |
| Guo100 | [2] 12-36 months | [0] <250 | [0] Age + gender + BMI or smoking status | [2] Spirometry | [2] <65 | [0] RCT | 6 | 1/3 |
| See167 | [2] 12-36 months | [0] <250 | [0] Age + gender + BMI or smoking status | [2] Spirometry | [1] 65-70 | [1] Cohort or case-control | 6 | 1/3 |
| Wan191 | [2] 12-36 months | [0] <250 | 2] All four | [2] Spirometry | 0] >70 | [0] RCT | 6 | 1/3 |
| Mar131 | [0] <12 months | [0] <250 | [0] Age + gender + BMI or smoking status | [2] Spirometry | [1] 65-70 | [1] Cohort or case-control | 4 | 1/3 |

**Table S3** Search results systematic review (number of studies = 61).

| Study | Country | Sample size (cohort name) | Average age or range | COPD definition | Disease severity | Follow-up (months) | QUADAS-2 score (out of 15) | Source | Marker(s) | Number of cases, by outcome | | |
| --- | --- | --- | --- | --- | --- | --- | --- | --- | --- | --- | --- | --- |
| Mortality | Exacerbation | Hospitalisation |
| Agusti *et al*., 2012 1 | Spain | 1755 (ECLIPSE) | 64 | Spirometry | GOLD II-IV | 36 | 15 | Publication | 6MWD | - | - | N/A |
| Fibrinogen |
| CRP |
| WBC |
| IL-6 |
| IL-8 |
| TNF-α |
| Agusti et al., 2013 2 | Spain | 2101 (ECLIPSE) | 64 | Spirometry | GOLD II-IV | 36 | 15 | Publication | 6MWD | 205 | - | 648 |
| Antonelli-Incalzi *et al*., 2006 3 | Italy | 134 | 69 | Spirometry | Severe COPD | >24 | 6 | Questionnaire | 6MWD | 28 | N/A | N/A |
| Heart rate | 29 |
| Fibrinogen | 27 |
| WBC | 29 |
| Bafadhel *et al*., 2011 4 | UK | 115 | 69 | Physician-diagnosis and spirometry | GOLD I-IV | 12 | 6 | Publication | WBC | N/A | 68 | N/A |
| CRP | 68 |
| Blumenthal *et al*., 2016 5 | USA | 326 (INSPIRE-II) | 66 | Spirometry | GOLD A-D | 60 | 11 | Publication | 6MWD | 69 | N/A | 69 |
| CRP | 69 | 69 |
| Bu *et al*., 2011 6 | China | 56 (MLCC) | 71 (median) | Spirometry | GOLD II-IV | 24 | 7 | Publication | 6MWD | N/A | N/A | N/A |
| Budweiser *et al*., 2007 7 | Germany | 98 | 65 | Sx, Spirometry | GOLD IV | >24 | 7 | Publication | WBC | 44 | N/A | N/A |
| Cano *et al*., 2004 8 | France | 309 | 72 | Spirometry | - | >8 | 10 | Dataset | 6MWD | 261 | N/A | 62 |
| CRP | 232 | 62 |
| Casanova *et al*., 2008 9 | USA, Spain | 576 | 68 | Hx, Spirometry | - | >36 | 14 | Publication | 6MWD | 220 | N/A | N/A |
| Celli *et al*., 2012 10 | Spain | 1843 (ECLIPSE) | 64 | Spirometry | GOLD II-IV | 36 | 13 | Questionnaire | 6MWD | 168 | N/A | N/A |
| Heart rate | 168 |
| Fibrinogen | 168 |
| WBC | 168 |
| IL-6 | 168 |
| IL-8 | 168 |
| TNF-α | 168 |
| Cote *et al*., 2007 11 | USA, Spain, Venezuela | 205 (BODE) | 67 | Spirometry | GOLD I-IV | 24 | 8 | Publication | 6MWD | N/A | N/A | 130 |
| Cote *et al*., 2007 12 | USA | 365 (BODE) | 68 | Sx, Spirometry | GOLD I-IV | 67 | 10 | Publication | 6MWD | 171 | N/A | N/A |
| Cote *et al*., 2008 13 | USA, Spain, Venezuela | 1379 (BODE) | 66 | Spirometry | GOLD I-IV | >25 | 14 | Publication | 6MWD | 623 | N/A | N/A |
| Cote *et al*., 2008 14 | USA, Spain | 444 (BODE) | 66 | Spirometry | GOLD I-IV | >37 | 10 | Publication | 6MWD | 206 | N/A | N/A |
| Heart rate | 206 |
| Dahl *et al*., 2001 15 | Denmark | 8955 (CCHS) | 58-62 | Spirometry | - | 60 | 15 | Publication | Fibrinogen | N/A | N/A | - |
| Dahl *et al*., 2007 16 | Denmark | 1302 (CCHS) | 68 | Spirometry | - | 96 | 12 | Publication | CRP | 83 | N/A | 185 |
| Dahl *et al*., 2011 17 | Denmark | 7974 (CCHS, CGPS) | 49, 60 | Spirometry, ICD-8 (491-92), ICD-10 (J41,J44) | - | 33 | 15 | Publication | CRP | N/A | N/A | 1085/ 1235 |
| Dajczman *et al*., 2015 18 | Canada | 237 | 69 | Spirometry | - | 12 | 6 | Publication | 6MWD | 90 | N/A | N/A |
| de Torres *et al*., 2008 19 | USA, Spain | 218 (BODE) | 65 | Spirometry | GOLD I-IV | 36 | 8 | Publication | 6MWD | 54 | N/A | N/A |
| CRP | 54 |
| Deng *et al*., 2014 20 | China | 116 | 71 | Hx, Sx, Spirometry | - | 32 | 7 | Publication | CRP | 21 | N/A | N/A |
| Donaldson *et al*., 2005 21 | UK | 148 | 69 (median) | Spirometry |  | >86 | 8 | Publication | IL-6 | N/A | - | N/A |
| IL-8 |
| Fibrinogen |
| Dreyse *et al*., 2015 22 | Chile | 100 | 69 | Spirometry | GOLD stage I-IV | 24 | 8 | Questionnaire | 6MWD | 9 | 80 | 15 |
| Heart rate | 9 | 81 | 16 |
| Fibrinogen | 9 | 80 | 16 |
| CRP | 9 | 81 | 16 |
| IL-6 | 9 | 81 | 16 |
| Durheim *et al*., 2015 23 | USA | 326 (INSPIRE-II) | 67 | Spirometry | GOLD A-D | 60 | 9 | Publication | 6MWD | 12 | N/A | 69 |
| Faganello *et al*., 2010 24 | Brasil | 120 | 65 | Spirometry | GOLD I-IV | 12 | 9 | Questionnaire | 6MWD | N/A | 60 | 21 |
| IL-8 | 36 | 18 |
| CRP | 39 | 21 |
| IL-6 | 36 | 18 |
| TNF-α | 36 | 18 |
| WBC | 36 | 18 |
| Ferrari *et al*., 2011 25 | Brasil | 95 | 67 | Spirometry | GOLD I-IV | 36 | 7 | Questionnaire | 6MWD | N/A | N/A | N/A |
| Ferrari *et al*., 2013 26 | Brasil | 53 | 64 | Spirometry | GOLD I-IV | 36 | 6 | Questionnaire | 6MWD | 11 | 91 | 16 |
| CRP | 11 | 49 | 16 |
| IL-6 | 8 | 49 | 16 |
| TNF-α | 10 | 49 | 15 |
| WBC | 11 | 49 | 16 |
| Gaki *et al*., 2011 27 | Greece | 117 | 65 | Spirometry | - | 24 | 8 | Publication | 6MWD | N/A | N/A | 74 |
| Fibrinogen | 74 |
| CRP | 74 |
| Groenewegen *et al*., 2008 28 | Netherlands | 277 (COSMIC) | 63 | Spirometry | - | 12 | 10 | Publication | Fibrinogen | N/A | N/A | 31 |
| CRP | 31 |
| TNF-α | 31 |
| Grolimund *et al*., 2015 29 | Switzerland | 469 (ProHOSP) | 74 | Sx, Spirometry | GOLD I-IV | >60 | 10 | Questionnaire | CRP | 287 | N/A | N/A |
| WBC | 287 |
| Guo *et al*., 2014 30 | China | 69 | 40-75 | Spirometry | GOLD II-III | 12 | 6 | Publication | IL-6 | N/A | 40 | N/A |
| IL-8 | 40 |
| TNF-α | 40 |
| Hopkinson *et al*., 2007 31 | UK | 64 | 62 | Spirometry | GOLD I-IV | 12 | 9 | Dataset | QMVC | N/A | 64 | N/A |
| Hurst *et al.,* 2010 32 | Spain | 2138 (ECLIPSE) | 63 | Spirometry | GOLD II-IV | 36 | 13 | Questionnaire | 6MWD | N/A | 1542 | N/A |
| Heart rate | 1583 |
| Fibrinogen | 1340 |
| CRP | 1530 |
| WBC | 1547 |
| IL-6 | 1532 |
| IL-8 | 1528 |
| TNF-α | 1537 |
| Husebo *et al*., 2014 33 | Norway | 403 (Bergen COPD) | 44–76 years | Spirometry | GOLD II-IV | 36 | 11 | Questionnaire | 6MWD | 62 | 266 | 132 |
| Heart rate | N/A | 297 | 146 |
| CRP | N/A | 287 | 144 |
| WBC | 70 | 287 | 142 |
| IL-6 | 31 | 286 | 143 |
| TNF-α | 28 | 286 | 143 |
| Jennings *et al*., 2009 34 | USA | 194 | 67 | Spirometry | - | 12 | 8 | Questionnaire | 6MWD | N/A | 109 | 31 |
| Jensen *et al*., 2013 35 | Denmark | 2442 (CCHS) | 59 | Spirometry | GOLD I-IV | >423 | 15 | Questionnaire | Heart rate | 1928 | N/A | 586 |
| CRP | N/A | N/A |
| Fibrinogen |
| Lacasse *et al.*, 2005 36 | Canada | 147 | 65 | Sx, Hx, Spirometry | - | >21 | 8 | Publication | Heart rate | 32 | N/A | N/A |
| Liu *et al*., 2011 37 | China | 114 | 70 | Spirometry | GOLD I-IV | >24 | 10 | Publication | 6MWD | 17 | N/A | N/A |
| Fibrinogen | 17 |
| CRP | 17 |
| Man *et al*., 2008 38 | Canada | 4787 (LHS) | 54 | Spirometry | - | 84 | 15 | Publication | CRP | 329 | N/A | N/A |
| Mannino *et al*., 2012 39 | USA | 8507 (NHANES III) | 40-80+ | Spirometry | GOLD I-IV | 216 | 15 | Publication | Fibrinogen | 3290 | N/A | N/A |
| Marino *et al*., 2014 40 | Brasil | 63 | 71 (median) | Spirometry | GOLD II-III | 6 | 4 | Questionnaire | 6MWD | N/A | 29 | N/A |
| Miller *et al*., 2013 41 | Spain | 2164 (ECLIPSE) | 63 | Spirometry | GOLD II-IV | 36 | 13 | Publication | 6MWD | - | - | N/A |
| IL-6 |
| IL-8 |
| Monninkhof *et al*., 2003 42 | Netherlands | 248 (COPE) | 65 | Spirometry | Almost exclusively GOLD II | 12 | 7 | Questionnaire | 6MWD | N/A | 162 | 26 |
| Moore *et al*., 2010 43 | UK | 110 (COPE) | 63 | Spirometry | GOLD I-IV | 6 | 9 | Publication | SNIP | 37 | N/A | N/A |
| Moy *et al*., 2013 44 | USA | 169 | 71 | Hx, Spirometry | GOLD I-IV | 16 | 7 | Publication | 6MWD | N/A | 99 | 54 |
| Moy *et al*., 2014 45 | USA | 167 | 71 | Hx, Spirometry | GOLD I-IV | 16 | 7 | Publication | 6MWD | N/A | 97 | 55 |
| IL-6 | 97 | 55 |
| CRP | 97 | 55 |
| Mullerova *et al*., 2015 46 | Spain | 2138 (ECLIPSE) | 63 | Spirometry | GOLD II-IV | 36 | 13 | Questionnaire | 6MWD | N/A | N/A | 650 |
| Heart rate | 670 |
| Fibrinogen | 546 |
| CRP | 645 |
| WBC | 656 |
| IL-6 | 654 |
| TNF-α | 655 |
| Ozgur *et al*., 2012 47 | Turkey | 73 | 59 | Spirometry | GOLD II-IV | 48 | 9 | Publication | 6MWD | 8 | N/A | N/A |
| Parker *et al*., 2014 48 | USA | 1339 (NHANES III) | 40-80+ | Spirometry | GOLD I-IV | 115 | 15 | Publication | Fibrinogen | 596 | N/A | N/A |
| CRP | 596 |
| WBC | 596 |
| Pinto-Plata *et al*., 2012 49 | USA | 253 | 65 | Hx, Spirometry | GOLD I-IV | 36 | 10 | Publication | 6MWD | 89 | N/A | N/A |
| IL-8 | 89 |
| IL-6 | 89 |
| TNF-α | 89 |
| Powrie *et al*., 2007 50 | UK | 142 | 66 | Spirometry | - | 12 | 7 | Publication | CRP | N/A | 61 | N/A |
| IL-6 | 61 |
| IL-8 | 61 |
| Seemungal *et al*., 2001 51 | UK | 137 (East London COPD) | 68 | Spirometry | - | 18 | 6 | Publication | Fibrinogen | N/A | 83 | N/A |
| IL-6 | 83 |
| Singh *et al*., 2010 52 | Spain | 488 (ECLIPSE) | 64 | Spirometry | GOLD II-IV | 12 | 11 | Publication | CRP | N/A | - | N/A |
| IL-6 |
| IL-8 |
| Spruit *et al*., 2012 53 | Denmark, UK, USA, Canada | 2110 (ECLIPSE) | 63 | Spirometry | GOLD II-IV | 36 | 13 | Publication | 6MWD | 200 | N/A | 650 |
| Swallow *et al*., 2007 54 | UK | 162 | 64 | Spirometry | GOLD I-IV | 48 | 11 | Dataset | QMVC | 36 | N/A | N/A |
| Thomsen *et al*., 2013 55 | Denmark | 8020 (CHCHS, CGPS) | 67 | Spirometry | GOLD I-IV | 60 | 14 | Publication | Fibrinogen | N/A | 931 | N/A |
| CRP | 931 |
| WBC | 931 |
| Valvi *et al*., 2012 56 | USA | 20192 (ARIC, CHS) | 45–64 | Spirometry | GOLD I-IV | >116 | 15 | Publication | Fibrinogen | 2995 | N/A | N/A |
| Wang *et al*., 2014 57 | China | 136 | 72 | Spirometry | GOLD I-III | 12 | 6 | Publication | 6MWD | N/A | 97 | N/A |
| Wang *et al*., 2014 58 | China | 331 (ChiCTR- TRC) | 63 | Spirometry | GOLD I-IV | 12 | 10 | Publication | 6MWD | N/A | N/A | - |
| IL-6 |
| IL-8 |
| TNF-α |
| Warnier *et al*., 2014 59 | Netherlands | 405 | 73 | Spirometry, ICPC (R91, R95) | GOLD I-IV | 84 | 11 | Publication | Heart rate | 132 | - | N/A |
| Waschki *et al*., 2011 60 | Germany | 170 | 65 | Spirometry | GOLD I-IV | 48 | 11 | Questionnaire | 6MWD | 26 | N/A | N/A |
| Heart rate | 26 |
| Fibrinogen | 26 |
| CRP | 26 |
| WBC | 26 |
| IL-6 | 25 |
| Wedzicha *et al*., 2000 61 | UK | 93 | 67 | Spirometry | - | 12 | 8 | Publication | Fibrinogen | N/A | 67 | N/A |
| IL-6 | 67 |

COPD, Chronic Obstructive Pulmonary Disease; Sx, signs and symptoms; Hx, medical history; ICD-9, International Disease Classification of Diseases ninth revision; 6MWD, Six-Minute Walk Distance; WBC, White Blood Cells; CRP, C-Reactive Protein; IL, Interleukins; TNF-α, Tumour Necrosis Factor-alpha; QMVC, Quadriceps Maximum Voluntary Contraction; SNIP, Sniff Nasal Inspiratory Pressure. Data are displayed as mean and standard deviations. Disease severity is either given as GOLD stage (I-IV) or group (A-D), as described by GOLD.62

**Figure S1** Adjusted hazard ratios for the risk of mortality with 95% confidence intervals, by biomarker. Values in grey are unadjusted and not included in the pooling of results. ****Adjusted for age, sex, body mass index, and smoking status, unless otherwise indicated. ^Adjusted for additional confounders; Blumenthal *et al.* adjusted for age, Charlson index, duration of COPD, GOLD, and coping skills training; Cote *et al*. adjusted for body mass index and Charlson score; Dajzman *et al.* adjusted for age, sex, and FEV1; Ozgur *et al.* adjusted for body mass index, IC/TLC, FEV1, dyspnoea index, PaO2, and PaCO2; Mannino *et al.* adjusted for age, sex, body mass index, smoking status, ethnicity, diabetes, cardiovascular disease, education level, and poverty income ratio; Valvi *et al.* adjusted for age, sex, body mass index, smoking status, ethnicity, education level, diabetes mellitus, cardiovascular disease, and GOLD stage; de Torres *et al.* adjusted for age, sex, pack-year history, cardiovascular risk factors or disease, and treatment with inhaled corticosteroids. Bars, 95% confidence intervals.

**Figure S2** Standardised mean differences with 95% confidence intervals for the risk of exacerbation, by biomarker. Bars, 95% confidence intervals.

**Figure S3** Standardised mean differences with 95% confidence intervals for the risk of hospitalisation, by biomarker. Bars, 95% confidence intervals.

(a) WBC (b) TNF-alpha (c) 6MWD

(d) resting heart rate (e) IL-6 (f) fibrinogen

(g) CRP

**Figure S4** Funnel plots for mortality

(a) WBC (b) TNF-alpha (c) 6MWD

(d) resting heart rate (e) IL-6 (f) fibrinogen

(g) CRP

**Figure S5** Galbraith plots for mortality

**Figure S6** Hazard ratios for mortality, sensitivity analysis. Lower quartile QUADAS-2 scores removed.

**Figure S7** Standardised mean differences for exacerbation, sensitivity analysis. Lower quartile QUADAS-2 scores removed.

**Figure S8** Standardised mean differences for hospitalisation, sensitivity analysis. Lower quartile QUADAS-2 scores removed.

**Figure S9** Hazard ratios for mortality using fixed-effect modelling, sensitivity analysis.

**Figure S10** Standardised mean differences for exacerbation using fixed-effect modelling, sensitivity analysis.

**Figure S11** Standardised mean differences for hospitalisation using fixed-effect modelling, sensitivity analysis.

(a) Follow up (b) Year of publication (c) Mean age cohort

**Figure S12** Meta-regression six-minute walk distance, hazard ratio mortality. “Bubble plot” with fitted meta-regression line.

(a) Follow up (b) Year of publication (c) Mean age cohort

**Figure S13** Meta-regression C-reactive protein, hazard ratio mortality. “Bubble plot” with fitted meta-regression line.

**References**

1. Agusti A, Edwards LD, Rennard SI, et al. Persistent systemic inflammation is associated with poor clinical outcomes in COPD: a novel phenotype. *PLoS ONE [Electronic Resource]* 2012;7(5):e37483. doi: <http://dx.doi.org/10.1371/journal.pone.0037483>

2. Agusti A, Edwards LD, Celli B, et al. Characteristics, stability and outcomes of the 2011 GOLD COPD groups in the ECLIPSE cohort. *Eur Respir J* 2013;42(3):636-46. doi: <http://dx.doi.org/10.1183/09031936.00195212>

3. Antonelli-Incalzi R, Corsonello A, Pedone C, et al. Drawing impairment predicts mortality in severe COPD. *Chest* 2006;130(6):1687-94. doi: 10.1378/chest.130.6.1687

4. Bafadhel M, McKenna S, Terry S, et al. Acute exacerbations of chronic obstructive pulmonary disease: identification of biologic clusters and their biomarkers. *Am J Respir Crit Care Med* 2011;184(6):662-71. doi: <http://dx.doi.org/10.1164/rccm.201104-0597OC>

5. Blumenthal JA, Smith PJ, Durheim M, et al. Biobehavioral Prognostic Factors in Chronic Obstructive Pulmonary Disease: Results From the INSPIRE-II Trial. *Psychosomatic Medicine* 2016;78(2):153-62. doi: <http://dx.doi.org/10.1097/PSY.0000000000000260>

6. Bu XN, Yang T, Thompson MA, et al. Changes in the BODE index, exacerbation duration and hospitalisation in a cohort of COPD patients. *Singapore Med J* 2011;52(12):894-900.

7. Budweiser S, Hitzl AP, Joerres RA, et al. Health-related quality of life and long-term prognosis in chronic hypercapnic respiratory failure: a prospective survival analysis. *Respiratory Research* 2007;8 doi: 10.1186/1465-9921-8-92

8. Cano NJM, Pichard C, Roth H, et al. C-reactive protein and body mass index predict outcome in end-stage respiratory failure. *Chest* 2004;126(2):540-46. doi: <http://dx.doi.org/10.1378/chest.126.2.540>

9. Casanova C, Cote C, Marin JM, et al. Distance and oxygen desaturation during the 6-min walk test as predictors of long-term mortality in patients with COPD. *Chest* 2008;134(4):746-52. doi: 10.1378/chest.08-0520

10. Celli BR, Locantore N, Yates J, et al. Inflammatory biomarkers improve clinical prediction of mortality in chronic obstructive pulmonary disease. *Am J Respir Crit Care Med* 2012;185(10):1065-72. doi: <http://dx.doi.org/10.1164/rccm.201110-1792OC>

11. Cote CG, Dordelly LJ, Celli BR. Impact of COPD exacerbations on patient-centered outcomes. *Chest* 2007;131(3):696-704. doi: 10.1378/chest.06-1610

12. Cote CG, Pinto-Plata V, Kasprzyk K, et al. The 6-min walk distance, peak oxygen uptake, and mortality in COPD. *Chest* 2007;132(6):1778-85.

13. Cote CG, Casanova C, Marin JM, et al. Validation and comparison of reference equations for the 6-min walk distance test. *Eur Respir J* 2008;31(3):571-78. doi: <http://dx.doi.org/10.1183/09031936.00104507>

14. Cote CG, Pinto-Plata VM, Marin JM, et al. The modified BODE index: validation with mortality in COPD. *Eur Respir J* 2008;32(5):1269-74. doi: <http://dx.doi.org/10.1183/09031936.00138507>

15. Dahl M, Tybjaerg-Hansen A, Vestbo J, et al. Elevated plasma fibrinogen associated with reduced pulmonary function and increased risk of chronic obstructive pulmonary disease. *Am J Respir Crit Care Med* 2001;164(6):1008-11.

16. Dahl M, Vestbo J, Lange P, et al. C-reactive protein as a predictor of prognosis in chronic obstructive pulmonary disease. *American Journal of Respiratory and Critical Care Medicine* 2007;175(3):250-55. doi: <http://dx.doi.org/10.1164/rccm.200605-713OC>

17. Dahl M, Vestbo J, Zacho J, et al. C reactive protein and chronic obstructive pulmonary disease: A Mendelian randomisation approach. *Thorax* 2011;66(3):197-204. doi: <http://dx.doi.org/10.1136/thx.2009.131193>

18. Dajczman E, Wardini R, Kasymjanova G, et al. Six minute walk distance is a predictor of survival in patients with chronic obstructive pulmonary disease undergoing pulmonary rehabilitation. *Can Respir J* 2015;22(4):225-9.

19. de Torres JP, Pinto-Plata V, Casanova C, et al. C-reactive protein levels and survival in patients with moderate to very severe COPD. *Chest* 2008;133(6):1336-43. doi: <http://dx.doi.org/10.1378/chest.07-2433>

20. Deng ZC, Zhao P, Cao C, et al. C-reactive protein as a prognostic marker in chronic obstructive pulmonary disease. *Experimental and Therapeutic Medicine* 2014;7(2):443-46. doi: <http://dx.doi.org/10.3892/etm.2013.1441>

21. Donaldson GC, Seemungal TAR, Patel IS, et al. Airway and systemic inflammation and decline in lung function in patients with COPD. *CHEST* 2005;128(4):1995-2004.

22. Dreyse J, Diaz O, Repetto PB, et al. Do frequent moderate exacerbations contribute to progression of chronic obstructive pulmonary disease in patients who are ex-smokers? *International Journal of COPD* 2015;10:525-33. doi: <http://dx.doi.org/10.2147/COPD.S76475>

23. Durheim MT, Smith PJ, Babyak MA, et al. Six-minute-walk distance and accelerometry predict outcomes in chronic obstructive pulmonary disease independent of Global Initiative for Chronic Obstructive Lung Disease 2011 Group. *Ann Am Thorac Soc* 2015;12(3):349-56. doi: <http://dx.doi.org/10.1513/AnnalsATS.201408-365OC>

24. Faganello MM, Tanni SE, Sanchez FF, et al. BODE index and GOLD staging as predictors of 1-year exacerbation risk in chronic obstructive pulmonary disease. *Am J Med Sci* 2010;339(1):10-4. doi: <http://dx.doi.org/10.1097/MAJ.0b013e3181bb8111>

25. Ferrari R, Tanni SE, Caram LM, et al. Predictors of health status do not change over three-year periods and exacerbation makes difference in chronic obstructive pulmonary disease. *Health Qual Life Outcomes* 2011;9:112. doi: <http://dx.doi.org/10.1186/1477-7525-9-112>

26. Ferrari R, Tanni SE, Caram LM, et al. Three-year follow-up of Interleukin 6 and C-reactive protein in chronic obstructive pulmonary disease. *Respiratory Research* 2013;14:24. doi: <http://dx.doi.org/10.1186/1465-9921-14-24>

27. Gaki E, Papatheodorou G, Pappa I, et al. Correlation between frequency of hospitalization of patients with severe copd and severity indices. *Pneumon* 2011;24(2):164-71.

28. Groenewegen K, Postma D, Hop W, et al. Increased systemic inflammation is a risk factor for COPD exacerbations. *Chest* 2008;133(2):350-7. doi: 10.1378/chest.07-1342

29. Grolimund E, Kutz A, Marlowe RJ, et al. Long-term Prognosis in COPD Exacerbation: Role of Biomarkers, Clinical Variables and Exacerbation Type. *Copd* 2015;12(3):295-305. doi: <http://dx.doi.org/10.3109/15412555.2014.949002>

30. Guo SJ, Sun ZT, Liu ES, et al. Effect of Bufei granule on stable chronic obstructive pulmonary disease: a randomized, double blinded, placebo-controlled, and multicenter clinical study. *Journal of Traditional Chinese Medicine* 2014;34(4):437-44.

31. Hopkinson NS, Tennant RC, Dayer MJ, et al. A prospective study of decline in fat free mass and skeletal muscle strength in chronic obstructive pulmonary disease. *Respiratory research* 2007;8:25.

32. Hurst JR, Vestbo J, Anzueto A, et al. Susceptibility to exacerbation in chronic obstructive pulmonary disease. *N Engl J Med* 2010;363(12):1128-38. doi: 10.1056/NEJMoa0909883

33. Husebo GR, Bakke PS, Aanerud M, et al. Predictors of exacerbations in chronic obstructive pulmonary disease - results from the bergen COPD cohort study. *PLoS ONE* 2014;9 (10) (no pagination)(e109721) doi: <http://dx.doi.org/10.1371/journal.pone.0109721>

34. Jennings JH, Digiovine B, Obeid D, et al. The association between depressive symptoms and acute exacerbations of COPD. *Lung* 2009;187(2):128-35. doi: <http://dx.doi.org/10.1007/s00408-009-9135-9>

35. Jensen MT, Marott JL, Lange P, et al. Resting heart rate is a predictor of mortality in COPD. *Eur Respir J* 2013;42(2):341-49. doi: <http://dx.doi.org/10.1183/09031936.00072212>

36. Lacasse M, Maltais F, Poirier P, et al. Post-exercise heart rate recovery and mortality in chronic obstructive pulmonary disease. *Respiratory Medicine* 2005;99(7):877-86.

37. Liu SF, Wang CC, Chin CH, et al. High value of combined serum C-reactive protein and BODE score for mortality prediction in patients with stable COPD. *Arch Bronconeumol* 2011;47(9):427-32. doi: <http://dx.doi.org/10.1016/j.arbres.2011.04.011>

38. Man SF, Xing L, Connett JE, et al. Circulating fibronectin to C-reactive protein ratio and mortality: a biomarker in COPD? *Eur Respir J* 2008;32(6):1451-7. doi: <http://dx.doi.org/10.1183/09031936.00153207>

39. Mannino DM, Valvi D, Mullerova H, et al. Fibrinogen, COPD and mortality in a nationally representative U.S. cohort. *Copd* 2012;9(4):359-66. doi: <http://dx.doi.org/10.3109/15412555.2012.668249>

40. Marino DM, Marrara KT, Arcuri JF, et al. Determination of exacerbation predictors in patients with COPD in physical therapy - a longitudinal study. *Braz J Phys Ther* 2014;18(2):127-36. doi: 10.1590/S1413-35552012005000146

41. Miller J, Edwards LD, Agusti A, et al. Comorbidity, systemic inflammation and outcomes in the ECLIPSE cohort. *Respiratory Medicine* 2013;107(9):1376-84. doi: <http://dx.doi.org/10.1016/j.rmed.2013.05.001>

42. Monninkhof E, van der Valk P, van der Palen J, et al. Effects of a comprehensive self-management programme in patients with chronic obstructive pulmonary disease. *Eur Respir J* 2003;22(5):815-20. doi: 10.1183/09031936.03.00047003

43. Moore AJ, Soler RS, Cetti EJ, et al. Sniff nasal inspiratory pressure versus IC/TLC ratio as predictors of mortality in COPD. *Respiratory Medicine* 2010;104(9):1319-25. doi: <http://dx.doi.org/10.1016/j.rmed.2010.03.001>

44. Moy ML, Teylan M, Weston NA, et al. Daily Step Count Predicts Acute Exacerbations in a US Cohort with COPD. *PLoS ONE* 2013;8 (4) (no pagination)(e60400) doi: <http://dx.doi.org/10.1371/journal.pone.0060400>

45. Moy ML, Teylan M, Danilack VA, et al. An index of daily step count and systemic inflammation predicts clinical outcomes in chronic obstructive pulmonary disease. *Ann Am Thorac Soc* 2014;11(2):149-57. doi: <http://dx.doi.org/10.1513/AnnalsATS.201307-243OC>

46. Mullerova H, Maselli DJ, Locantore N, et al. Hospitalized exacerbations of COPD: Risk factors and outcomes in the ECLIPSE cohort. *Chest* 2015;147(4):999-1007. doi: <http://dx.doi.org/10.1378/chest.14-0655>

47. Ozgur ES, Nayci SA, Ozge C, et al. An integrated index combined by dynamic hyperinflation and exercise capacity in the prediction of morbidity and mortality in COPD. *Respiratory Care* 2012;57(9):1452-59. doi: <http://dx.doi.org/10.4187/respcare.01440>

48. Parker DR, Liu J, Roberts MB, et al. Is inflammatory chronic obstructive pulmonary disease a coronary heart disease risk equivalent? A longitudinal analysis of the third National Health and Nutrition Examination Survey (NHANES III), 1988-1994. *BMC Pulmonary Medicine* 2014;14 (1) (no pagination)(195) doi: <http://dx.doi.org/10.1186/1471-2466-14-195>

49. Pinto-Plata V, Casanova C, Mullerova H, et al. Inflammatory and repair serum biomarker pattern: association to clinical outcomes in COPD. *Respiratory Research* 2012;13:71. doi: <http://dx.doi.org/10.1186/1465-9921-13-71>

50. Powrie DJ, Wilkinson TM, Donaldson GC, et al. Effect of tiotropium on sputum and serum inflammatory markers and exacerbations in COPD. *Eur Respir J* 2007;30(3):472-8.

51. Seemungal T, Harper-Owen R, Bhowmik A, et al. Respiratory viruses, symptoms, and inflammatory markers in acute exacerbations and stable chronic obstructive pulmonary disease. *Am J Respir Crit Care Med* 2001;164(9):1618-23.

52. Singh D, Edwards L, Tal-Singer R, et al. Sputum neutrophils as a biomarker in COPD: Findings from the ECLIPSE study. *Respiratory Research* 2010;11 (no pagination)(77) doi: <http://dx.doi.org/10.1186/1465-9921-11-77>

53. Spruit MA, Polkey MI, Celli B, et al. Predicting outcomes from 6-minute walk distance in chronic obstructive pulmonary disease. *Journal of the American Medical Directors Association* 2012;13(3):291-7. doi: <http://dx.doi.org/10.1016/j.jamda.2011.06.009>

54. Swallow EB, Reyes D, Hopkinson NS, et al. Quadriceps strength predicts mortality in patients with moderate to severe chronic obstructive pulmonary disease. *Thorax* 2007;62(2):115-20.

55. Thomsen M, Ingebrigtsen TS, Marott JL, et al. Inflammatory biomarkers and exacerbations in chronic obstructive pulmonary disease. *JAMA - Journal of the American Medical Association* 2013;309(22):2353-61. doi: <http://dx.doi.org/10.1001/jama.2013.5732>

56. Valvi D, Mannino DM, Mullerova H, et al. Fibrinogen, chronic obstructive pulmonary disease (COPD) and outcomes in two United States cohorts. *International Journal of COPD* 2012;7:173-82. doi: <http://dx.doi.org/10.2147/COPD.S29892>

57. Wang M, Li J, Li S, et al. Effects of comprehensive therapy based on traditional Chinese medicine patterns on older patients with chronic obstructive pulmonary disease: a subgroup analysis from a four-center, randomized, controlled study. *Front* 2014;8(3):368-75. doi: <http://dx.doi.org/10.1007/s11684-014-0360-0>

58. Wang G, Liu B, Cao Y, et al. Effects of two Chinese herbal formulae for the treatment of moderate to severe stable chronic obstructive pulmonary disease: A multicenter, double-blind, randomized controlled trial. *PLoS ONE* 2014;9 (8) (no pagination)(e103168) doi: <http://dx.doi.org/10.1371/journal.pone.0103168>

59. Warnier MJ, Rutten FH, De Boer A, et al. Resting heart rate is a risk factor for mortality in chronic obstructive pulmonary disease, but not for exacerbations or pneumonia. *PLoS ONE* 2014;9 (8) (no pagination)(e105152) doi: <http://dx.doi.org/10.1371/journal.pone.0105152>

60. Waschki B, Kirsten A, Holz O, et al. Physical activity is the strongest predictor of all-cause mortality in patients with COPD: A prospective cohort study. *Chest* 2011;140(2):331-42. doi: <http://dx.doi.org/10.1378/chest.10-2521>

61. Wedzicha JA, Seemungal TA, MacCallum PK, et al. Acute exacerbations of chronic obstructive pulmonary disease are accompanied by elevations of plasma fibrinogen and serum IL-6 levels. *Thromb Haemost* 2000;84(2):210-5.

62. Global Initiative for Chronic Obstructive Lung Disease (GOLD). Global Strategy for the Diagnosis, Management and Prevention of COPD, 2016.
